# Supplementary material
Source: PubMed Central journal article supplement (PMC5693762)
Supplement: NIHMS882380-supplement-supplement_1.pdf [file NIHMS882380-supplement-supplement_1.pdf]

## Supplementary materials

**Table S1. Correlations of summary statistics (z-scores) between AD and each cancer type, with a block Jackknife p-value<sup>a</sup>**

| Trait 1                | Trait 2: Cancer     | Corr1<br>(of z-scores) | bjk<br>p-value1 |
|------------------------|---------------------|------------------------|-----------------|
| Alzheimer's<br>disease | All Colon           | 0.002                  | 0.583           |
|                        | Breast ER-negative  | 0.008                  | 0.069           |
|                        | All Breast          | 0.009                  | 0.089           |
|                        | Prostate aggressive | -0.005                 | 0.223           |
|                        | All Prostate        | -0.006                 | 0.236           |
|                        | Ovarian             | -0.003                 | 0.581           |
|                        | Lung adenocarcinoma | 0.009                  | 0.025           |
|                        | Lung squamous       | 0.012                  | 0.003           |
|                        | All Lung            | 0.015                  | 0.001           |

<sup>a</sup>Adjacent SNPs on the same chromosome were divided into blocks; overall there were around 200 blocks across the genome with each block size of 25K-28K SNPs. Block jackknife (bjk) estimates were obtained via a leave-one-block-out estimation procedure

**Table S2.** Genetic correlation between AD and each significant cancer type in the eight functional categories

| <b>Annotation</b>     | <b>Cancer type</b> | <b>Num_SNPs<sup>a</sup></b> | <b>r<sub>g</sub></b> | <b>SE</b> | <b>P-value</b> |
|-----------------------|--------------------|-----------------------------|----------------------|-----------|----------------|
| <b>Repressed</b>      | Any cancer         | 2,200,465                   | -0.127               | 0.310     | 0.681          |
|                       | Breast             | 2,172,902                   | -0.132               | 0.348     | 0.705          |
|                       | Lung               | 2,610,980                   | -0.052               | 0.259     | 0.841          |
| <b>H3K4me1</b>        | Any cancer         | 2,089,387                   | 0.087                | 0.061     | 0.155          |
|                       | Breast             | 2,062,737                   | 0.087                | 0.064     | 0.173          |
|                       | Lung               | 2,492,345                   | 0.073                | 0.080     | 0.359          |
| <b>H3K27ac</b>        | Any cancer         | 1,879,775                   | 0.095                | 0.058     | 0.100          |
|                       | Breast             | 1,860,057                   | 0.103                | 0.066     | 0.119          |
|                       | Lung               | 2,232,313                   | 0.074                | 0.082     | 0.369          |
| <b>Intron</b>         | Any cancer         | 1,907,385                   | 0.050                | 0.100     | 0.616          |
|                       | Breast             | 1,883,447                   | 0.101                | 0.106     | 0.340          |
|                       | Lung               | 2,254,094                   | 0.038                | 0.129     | 0.768          |
| <b>Transcribed</b>    | Any cancer         | 1,698,138                   | 0.035                | 0.070     | 0.619          |
|                       | Breast             | 1,677,283                   | 0.038                | 0.073     | 0.604          |
|                       | Lung               | 2,003,018                   | 0.009                | 0.080     | 0.910          |
| <b>Super enhancer</b> | Any cancer         | 803,218                     | 0.157                | 0.079     | 0.046          |
|                       | Breast             | 794,399                     | 0.069                | 0.087     | 0.427          |
|                       | Lung               | 952,330                     | 0.094                | 0.093     | 0.313          |
| <b>DHS</b>            | Any cancer         | 830,077                     | 0.058                | 0.077     | 0.448          |
|                       | Breast             | 818,119                     | 0.069                | 0.075     | 0.356          |
|                       | Lung               | 994,325                     | 0.083                | 0.094     | 0.378          |
| <b>H3K4me3</b>        | Any cancer         | 631,807                     | -0.002               | 0.065     | 0.974          |
|                       | Breast             | 625,431                     | 0.005                | 0.068     | 0.936          |

---

|      |         |        |       |       |
|------|---------|--------|-------|-------|
| Lung | 750,740 | -0.022 | 0.074 | 0.762 |
|------|---------|--------|-------|-------|

---

<sup>a</sup>overlapping SNPs
